# Supplementary material for: Archaeological sharks: Late Holocene changes in trophic ecology and habitat use of sharks in South Brazil
Source: Research Square preprint supplement (doi:10.21203/rs.3.rs-2719805/v1), 2023-03-27
Supplement: Supplementary file 1 [file 6bd5bbd1ac13544d6a574140.docx]

**Teeth class sizes and available total range**

To minimize sampling different class sizes or juveniles for *Carcharhinus* and other considered species, only archaeological teeth with a specific crown height size range were sampled for SIA: *Carcharhinus* group 0.8–1.7 cm (*Carcharhinus obscurus*, *Carcharhinus plumbeus* and *Carcharhinus brachyurus*, N = 18), available total range for sampling (ATR): 0.4–1.7 cm; *Carcharhinus* *leucas* 0.8–1.5 cm (N = 4), ATR: 0.6–1.5 cm;, ATR: 0.4–1.5 cm; *C*. *taurus* 1.5-2.6 cm (N = 14), ATR: 0.7–2.8 cm; *C*. *carcharias* 1.2-2.5 cm (N = 7), ATR: 0.6–3 cm; *Galeocerdo cuvier* 1.0-2.5 cm (N = 7) ATR: 0.6–2.5 cm;, *Negaprion brevirostris* 1.1-1.5 cm (N = 4), ATR: 0.5–1.5 cm; *Isurus paucus* 1.55-2.75 cm (N = 4), ATR: 1.55–2.75 cm.

**Choosing EDTA as decalcifying agent**

The mineralized matrix in shark teeth consists of fluoropatite (Ca5(PO4)F) in the outer layer, whereas the inner layer or dentin is mainly made of hydroxyapatite (Ca5(PO4)OH) with some degree of carbonates substitution forming carbonated apatites (LeGeros 1981; Enax et al. 2012; ‌Lübke et al. 2015). The inorganic carbon present in hydroxyapatite of dentin differs in isotopic composition to the organic component (Newsome et al. 2010); therefore, the collagen must be isolated prior to SIA. To isolate collagen, it has been suggested the use of ethylenediaminetetraacetic acid (EDTA) in shark vertebrae, likewise made of hydroxyapatite, as an alternative to use hydrochloric acid (HCl) due to the HCL rapid dissolution of both collagen and organic matrix (Kim and Koch 2012). Furthermore, EDTA is indicated for fossil samples (or presumably samples with diagenetic alterations) because EDTA decalcification is more effective than using HCl, also giving a product free from humic acids (Tuross et al. 1988)

**Stable Isotope Analysis**

Carbon and nitrogen stable isotope ratios were measured using a Costech (4010) elemental analyzer coupled to a Thermo Scientific Delta V isotope ratio mass spectrometer at the University of New Mexico Center for Stable Isotopes (Albuquerque, NM). Stable isotope data are expressed as δ values using the equation X = [(Rsample – Rstandard)/Rstandard] × 1000 (‰), where X is the heavy isotope of interest, Rsample and Rstandard are respectively the ratios of 15N/14N and 12C/13C for each sample and their standard. Pee Dee Belemnite (V-PDB) limestone and atmospheric N2 were used as standard reference materials for carbon and nitrogen, respectively. The reported analytical precision was < 0.2‰ for δ15N and < 0.1‰ for δ13C. A correction factor of 0.022‰ was applied per year (counting from the latest to the most recent year of when shark samples were obtained) to all modern sharks’ samples carbon isotope values to account for the Suess effect (Indermühle et al. 1999).
