# Supplementary material for: Archaeological sharks: Late Holocene changes in trophic ecology and habitat use of sharks in South Brazil
Source: Research Square preprint supplement (doi:10.21203/rs.3.rs-2719805/v1), 2023-03-27
Supplement: Supplementary file 1 [file 47c7bf3f6fc6bfdad9583570.xlsx]

## Sheet: Sheet1
Species	Sample ID	Excavation Layer	Site	Grid Number	Weight (g)	C:N ratio
Carcharhinus brachyurus	14	2	RMII	M3	0.422	2.8074
Carcharhinus brachyurus	651	1	RMII	D6	0.612	2.87706
Carcharhinus brachyurus	5	3	RMII	L3	0.792	2.78896
Carcharhinus brachyurus	28.1	5	RMII	F27	1.533	2.82028
Carcharhinus leucas	134	1	RMII	K20	0.699	2.76281
Carcharhinus leucas	104	2	RMII	I13	1.605	3.09083
Carcharhinus leucas	28	1	RMII	F19	1.437	2.97868
Carcharhinus leucas	129	4	RMII	N4	0.733	2.82662
Carcharhinus plumbeus	601	1	RMII	J20	0.662	2.84357
Carcharhinus plumbeus	1046	2	RMII	E19	0.556	2.71623
Carcharhinus plumbeus	1047	2	RMII	E19	0.409	2.73838
Carcharhinus plumbeus	1789	3	RMII	I4	1.5	2.73157
Carcharhinus plumbeus	1811	5	RMII	F20	1.341	2.7983
Carcharhinus plumbeus	34	7	RMII	QEFG21	1.355	2.79106
Carcharias taurus	6	4	RMII	N8	0.433	2.83376
Carcharias taurus	402	1	RMII	F3	0.452	2.78426
Carcharias taurus	8	4	RMII	E14	0.59	2.79817
Carcharias taurus	400	1	RMII	F20	0.912	2.86748
Carcharias taurus	13	5	RMII	E17	0.906	2.82734
Carcharias taurus	894	6	RMII	G16	1.22	2.97322
Carcharias taurus	912	7	RMII	K2	1.431	3.48305
Carcharias taurus	401	1	RMII	E15	1.926	2.80942
Carcharias taurus	273	3	RMII	g21	1.51	2.95342
Carcharias taurus	704	2	RMII	K13	1.543	2.96506
Carcharias taurus	705	3	RMII	H16	1.499	3.05933
Carcharias taurus	241	3	RMII	I3/H3	1.648	2.91609
Carcharias taurus	147	2	RMII	F16	1.506	3.20415
Carcharias taurus	873D	1	RMII	B8	0.42	2.9054
Carcharodon carcharias	25	3	RMII	M10	0.671	2.76742
Carcharodon carcharias	1	3	RMII	F16	0.62	3.08368
Carcharodon carcharias	19	5	RMII	Q9	1.27	2.96667
Carcharodon carcharias	4	3	RMII	K14	1.357	3.56439
Carcharodon carcharias	451	1	RMII	H13	1.672	3.11113
Carcharodon carcharias	45	2	RMII	G15	1.61	2.96783
Carcharodon carcharias	1807	8	RMII	M12-222	1.42	3.48384
Galeocerdo cuvier	930	2	RMII	G18	0.312	2.73172
Galeocerdo cuvier	10	6	RMII	L5	0.933	2.76456
Galeocerdo cuvier	32	4	RMII	K19	1	2.79976
Galeocerdo cuvier	32.1	4	RMII		1.033	2.74539
Galeocerdo cuvier	71	1	RMII	H07	1.454	3.03844
Galeocerdo cuvier	154	3	RMII	K07	1.23	3.22255
Galeocerdo cuvier	41	1	RMII	G03	1.469	2.79706
Isurus paucus	204	5	RMII	M4	0.403	3.08857
Isurus paucus	2	3	RMII	M4	1.126	3.46465
isurus paucus	970	2	RMII	F17	1.224	3.00244
isurus paucus	1810	4	RMII	F17	1.641	3.39115
Negaprion brevirostris	36	2	RMII	Q19	0.333	2.85932
Negaprion brevirostris	37	2	RMII	I9	0.64	2.75156
Negaprion brevirostris	12	5	RMII	E	1.292	2.84016
Negaprion brevirostris	701	1	RMII	G4	1.427	2.90796
