# Supplementary material for: Archaeological sharks: Late Holocene changes in trophic ecology and habitat use of sharks in South Brazil
Source: Research Square preprint supplement (doi:10.21203/rs.3.rs-2719805/v1), 2023-03-27
Supplement: Supplementary file 3 [file bef0d02f4ae0218eb9f0e6b6.xlsx]

## Sheet: Sheet1
Collection number	Procedence	Genus	Species	Taxonomy	Ontogeny / Recorded Total length (cm)	Country	State	County	Date
05919	MOVI	Carcharias	taurus	Rafinesque, 1810	Adult / NA	Brazil	SC	Barra Velha	1992
28839	MOVI	Carcharias	taurus	Rafinesque, 1810	Adult / 2670 cm	Brazil	SC	Piçarras	2003
31327	MOVI	Carcharias	taurus	Rafinesque, 1810		Brazil	SC
16400	MOVI	Isurus	oxyrinchus	Rafinesque, 1810		Brazil	SC		2000
16401	MOVI	Isurus	oxyrinchus	Rafinesque, 1810		Brazil	SC		2000
17312	MOVI	Isurus	oxyrinchus	Rafinesque, 1810		Brazil	SC		2001
17316	MOVI	Isurus	oxyrinchus	Rafinesque, 1810		Brazil	SC		2001
29092	MOVI	Isurus	oxyrinchus	Rafinesque, 1810		Brazil	SC		2003
05253	MOVI	Carcharodon	carcharias	Linnaeus, 1758	NA / 300 - 350 cm	Brazil	SC	Governador Celso Ramos	1975
00075	MOVI	Carcharhinus	brachyurus	Günther, 1870	Adult / 231 cm	Brazil	RS	Imbé	1990
30446	MOVI	Carcharhinus	brachyurus	Günther, 1870	Adult / NA	Brazil	RS		2003
30447	MOVI	Carcharhinus	brachyurus	Günther, 1870	Subadult / NA	Brazil	RS		2003
24622	MOVI	Carcharhinus	plumbeus	Nardo, 1827	Juvenile / 108 cm	Brazil	RS		1980
04446	MOVI	Carcharhinus	obscurus	LeSueur, 1818		Brazil	SC		1994
08511	MOVI	Carcharhinus	obscurus	LeSueur, 1818	Juvenile / NA	Brazil	SC		1994
05921	MOVI	Carcharhinus	obscurus	LeSueur, 1818	Adult / NA	Brazil	SC	Barra Velha	1992
40045	MOVI	Carcharhinus	obscurus	LeSueur, 1818		Brazil	SC		1990
Didatical Colection 01	UFSC/ECZ	Carcharias	taurus	Rafinesque, 1810	Adult / NA	Brazil	SC
Didatical Colection 02	UFSC/ECZ	Carcharias	taurus	Rafinesque, 1810	Adult / NA	Brazil	SC
Didatical Colection 03	UFSC/ECZ	Carcharias	taurus	Rafinesque, 1810	Adult / NA	Brazil	SC
Didatical Colection 04	UFSC/ECZ	Carcharias	taurus	Rafinesque, 1810	Adult / NA	Brazil	SC
Didatical Colection 05	UFSC/ECZ	Carcharhinus	leucas	Rafinesque, 1810	Adult / NA	Brazil	SC
─	Donation/Fisheries	Carcharias	taurus	Rafinesque, 1810	Adult / NA	Brazil	SC		2017
─	Donation/Fisheries	Carcharhinus	limbatus	Müller and Henle, 1839		Brazil	SC		2018
─	ICMBio	Isurus	oxyrhinhus	Rafinesque, 1810		Brazil	SC		2017
─	ICMBio	Galeocerdo	cuvier	Péron & Lesueur, 1822	Adult / 345 cm	Brazil	SC	Itajaí	1999
